# Supplementary material for: Passivation of the grain boundaries of CH3NH3PbI3 using carbon quantum dots for highly efficient perovskite solar cells with excellent environmental stability
Source: Royal Society of Chemistry journal article supplement (doi:10.1039/c8nr08295b), 2018-11-20
Supplement: c8nr08295b1.pdf [file c8nr08295b1.pdf]

**Passivation the Grain Boundaries of CH<sub>3</sub>NH<sub>3</sub>PbI<sub>3</sub> by Carbon Quantum Dots for Highly Efficient Perovskite Solar Cells with Excellent Environmental Stability**

*Qiang Guo,<sup>a</sup> Fanglong Yuan,<sup>c</sup> Bing Zhang,<sup>a</sup> Shijie Zhou,<sup>a</sup> Jin Zhang,<sup>b</sup> Yiming Bai,<sup>a</sup> Louzhen Fan<sup>\*c</sup>, Tasawar Hayat,<sup>d</sup> Ahmed Alsaedi<sup>d</sup> and Zhan'ao Tan<sup>\*a,b</sup>*

Qiang Guo, Fanglong Yuan and Bing Zhang contributed equally to this work.

<sup>a</sup> State Key Laboratory of Alternate Electrical Power System with Renewable Energy Sources, North China Electric Power University, Beijing 102206, China.

<sup>b</sup> Beijing Advanced Innovation Center for Soft Matter Science and Engineering, Beijing University of Chemical Technology, Beijing 100029, China.

<sup>c</sup> Department of Chemistry, Beijing Normal University, Beijing 100875, China.

<sup>d</sup> NAAM Research Group, Faculty of Science, King Abdulaziz University, Jeddah 21589, Saudi Arabia.

Corresponding authors: E-mail: [tanzhanao@mail.buct.edu.cn](mailto:tanzhanao@mail.buct.edu.cn) (Z. A. Tan); E-mail: [lzfan@bnu.edu.cn](mailto:lzfan@bnu.edu.cn) (L. Z. Fan)

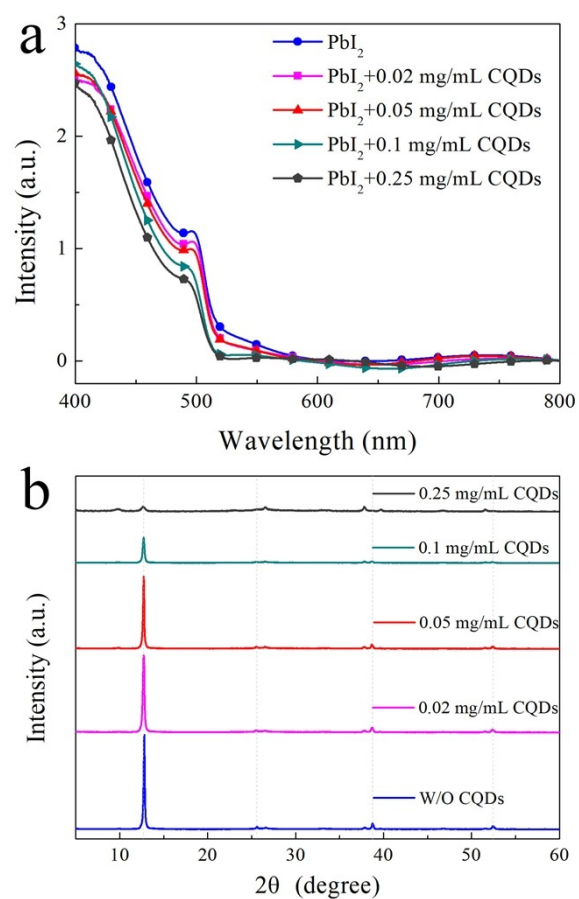

**Figure S1.** UV-vis absorption spectra and XRD patterns of  $\text{PbI}_2$  films with different concentration of CQDs.

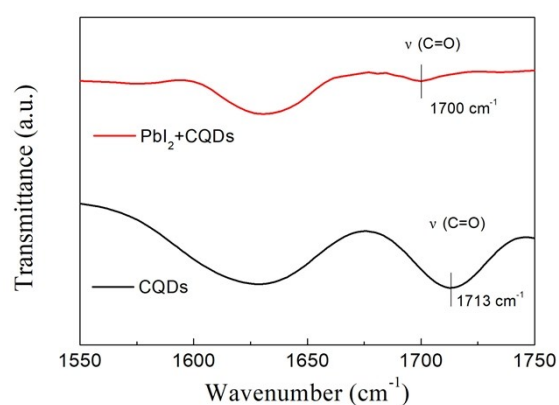

**Figure S2.** FTIR spectra of CQDs and  $\text{PbI}_2$  film with 10 mg/mL CQDs additive.

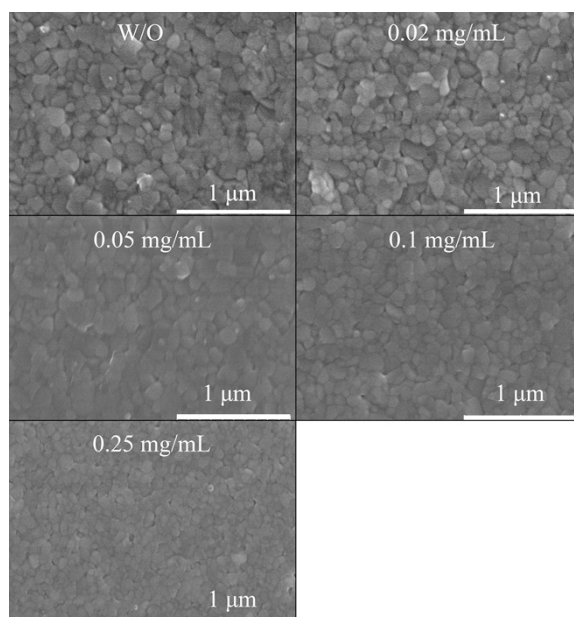

**Figure S3.** Top-view SEM images of  $\text{PbI}_2$  films with different concentration of CQDs.

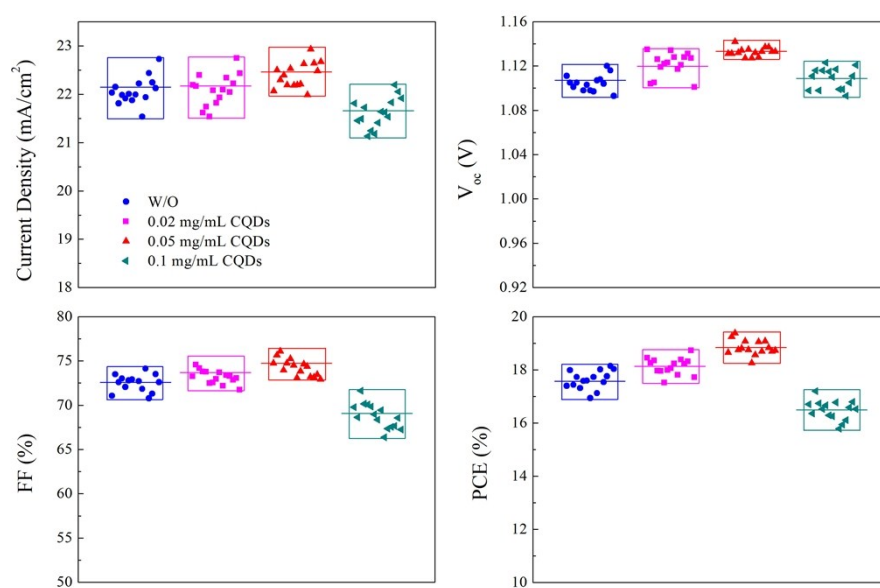

**Figure S4.** (a)  $J_{sc}$ , (b)  $V_{oc}$ , (c) FF, and (d) PCE distribution of 15 individual PSCs without and with 0.02, 0.05 and 0.1 mg/mL CQDs.

**Table S1.** TRPL decay fitting parameters of perovskite films with and without CQDs.

|                    | A <sub>1</sub> (%) | τ <sub>1</sub> (ns) | A <sub>2</sub> (%) | τ <sub>2</sub> (ns) | A <sub>3</sub> (%) | τ <sub>3</sub> (ns) | τ <sub>avg</sub> (ns) |
|--------------------|--------------------|---------------------|--------------------|---------------------|--------------------|---------------------|-----------------------|
| W/O CQDs           | 12.17              | 0.76                | 10.69              | 24.00               | 77.13              | 196.66              | 154.35                |
| 0.05 mg/mL<br>CQDs | 4.82               | 0.86                | 11.87              | 37.47               | 83.31              | 199.24              | 170.48                |

$$\tau_{avg} = \sum_i A_i \tau_i, \text{ where } \sum_i A_i = 1$$
